# Supplementary material for: Effects of Therapeutic Lifestyle Change diets high and low in dietary fish-derived FAs on lipoprotein metabolism in middle-aged and elderly subjects
Source: PubMed Central journal article supplement — J Lipid Res. 2012 Sep;53(9):1958–67. doi: 10.1194/jlr.P024315 (PMC3413235; doi:10.1194/jlr.p024315), 2012-09
Supplement: supp_P024315_jlr.P024315-1.pdf [file supp_P024315_jlr.P024315-1.pdf]

**Table 1: Summary of studies that examined the effects of decreasing dietary saturated fat together with increasing n-6 fatty acids on apoB-100 metabolism**

| Ref | Authors (Year)               | Tracer | Subjects (N)                                                                       | Diet                                                                                                                                                                                                          | Study Findings                                                                               |
|-----|------------------------------|--------|------------------------------------------------------------------------------------|---------------------------------------------------------------------------------------------------------------------------------------------------------------------------------------------------------------|----------------------------------------------------------------------------------------------|
| 31  | Cortese <i>et al</i> (1983)  | RI     | Mild to moderate hypercholesterolemia and/or hypertriglyceridemia (6 men, 6 women) | <p>Low fat (25% of energy), 340 mg/day cholesterol</p> <p>vs.</p> <p>High fat (45% of energy), 340 mg/day cholesterol</p> <p>*3 – 4 weeks intervention</p>                                                    | <p>↓ 20% LDL-apoB-100 PR</p> <p>↑ 15% LDL-apoB-100 FCR</p> <p>↔ VLDL-apoB-100 PR or FCR</p>  |
|     |                              |        |                                                                                    | <p>High n-6 PUFA (P:S ratio 0.12), 365 mg/day cholesterol</p> <p>vs.</p> <p>Low n-6 PUFA (P:S ratio 3.8), 365 mg/day cholesterol</p> <p>*In both diets, 45% of energy as fat</p> <p>*4 weeks intervention</p> | <p>↓ 23% LDL-apoB-100 PR</p> <p>↓ 31% VLDL-apoB-100 PR</p> <p>↔ VLDL or LDL-apoB-100 FCR</p> |
| 32  | Shepherd <i>et al</i> (1980) | RI     | Healthy normolipidemic (8 men)                                                     | <p>High n-6 PUFA (P:S ratio 4.0), 400 mg/day cholesterol</p> <p>vs.</p>                                                                                                                                       | <p>↑ 9% LDL-apoB-100 FCR</p> <p>↔ LDL-apoB-100 PR</p>                                        |

---

|    |                               |    |                                                                  |                                                                                                                |                                                                                                     |
|----|-------------------------------|----|------------------------------------------------------------------|----------------------------------------------------------------------------------------------------------------|-----------------------------------------------------------------------------------------------------|
|    |                               |    |                                                                  | Low n-6 PUFA (P:S ratio 0.25),<br>400 mg/day cholesterol                                                       |                                                                                                     |
|    |                               |    |                                                                  | *In both diets, 40% of energy as fat<br>* 5 weeks intervention                                                 |                                                                                                     |
| 33 | Turner <i>et al</i><br>(1981) | RI | 5 normolipidemic.<br>6 FH<br>2 FCH<br>2 FHTG<br>(8 men, 7 women) | High n-6 PUFA (P:S ratio 8.0),<br><150 mg/day cholesterol<br>(except 2 subjects; 210 and 240 mg/day)           | In 7 “low LDL cholesterol” men<br>↓ 10% LDL-apoB-100 PR<br>↔ LDL-apoB-100 FCR                       |
|    |                               |    | Analysis performed based<br>on high vs. low LDL<br>cholesterol   | vs.<br><br>Low n-6 PUFA (P:S ratio 0.2),<br><150 mg/day cholesterol<br>(except 2 subjects; 210 and 240 mg/day) | In 8 “high LDL cholesterol” men and<br>women<br><br>↓ 25% LDL-apoB-100 PR<br>↑ 17% LDL-apoB-100 FCR |
|    |                               |    |                                                                  | *In both diets, 40% of energy as fat<br>* 7 – 9 weeks intervention                                             |                                                                                                     |

---

FCH: familial combine hyperlipidemia; FCR: fractional catabolic rate; FH: familial hypercholesterolemia; FHTG: familial hypertriglyceridemia; PR: production rate; PUFA: polyunsaturated fatty acids; P:S ratio: polyunsaturated to saturated fatty acid ratio; RI: radioisotope
